# Supplementary material for: The EDN1 Missense Variant rs5370G > T Regulates Adaptation and Maladaptation under Hypobaric Hypoxia
Source: MDPI journal article supplement (doi:10.3390/ijerph191811174), 2022-09-06
Supplement: s1 [file s1]

### **Supplementary Tables**

**Table S1.** PCR conditions of rs5370 polymorphism of *EDN1*

**Table S2.** qRT-PCR conditions of *EDN1*

**Table S3.** Clinical characteristics of the HAPE-f, HAPE-p and, HLs

**Table S4.** System characterization for parameters after 100-ns simulation

### **Supplementary figures**

**Figure S1.** ConSurf analysis plot. The plot revealed residual conservation of the *EDN1* sequence. The rs5370 residue was located in the variable region.

**Figure S2.** Frustration and configurational loss and gain contacts in K198N region. (A) Panel shows density and covariances matrices of *EDN1* K198. (b) Panel depicts *EDN1* 198N density and covariances matrices type. Green shades represent minimally frustrated and red shades represent highly frustrated residues. Å, Angstrom; i and j, covariance matrix for residues; %, per cent.

**Table S1.** PCR conditions of rs5370 polymorphism of *EDN1*

| Gene | rs ID     | Primer Sequence                      | Cycling Conditions                                             | Product size, bp |
|------|-----------|--------------------------------------|----------------------------------------------------------------|------------------|
| EDN1 | rs5370G/T | F 5'-<br>GACCATGAGAAACAGCGTCA-<br>3' | I95°C 5', D95°C 30", A60°C 40", E72°C 40",<br>35cy, FE72°C 10' | 201              |
|      |           | R 5'-<br>AGAGGATGCTCCTGCTCTGA-3'     |                                                                |                  |
|      |           | IP 5'-<br>CTAGGGTTCGACTTTCCGTT-3'    | I96°C 3', D96°C 10", A50°C 5", E60°C 30",<br>32cy, 4°C 10'     |                  |
|      |           |                                      |                                                                |                  |

A, annealing; cy, cycles; D, denaturation; E, extension; F, forward; FE, final extension; I, initial denaturation; IP, internal primer; R, reverse; bp, base pair.

**Table S2.** qRT-PCR conditions of *EDN1*

| Gene        | Primer sequences                                                    | Cycling conditions                      | Product size (bp) |
|-------------|---------------------------------------------------------------------|-----------------------------------------|-------------------|
| <i>EDN1</i> | F 5' - AGCTGTCCAAGTCAGACGC - 3'<br>R 5' - GCCCAAGTGCCCTTTTAACG - 3' | I 94°C 10', D94°C 15", A60°C 60", 40 cy | 84                |

A, annealing; cy, cycles; D, denaturation; E, extension; F, forward; FE, final extension; I, initial denaturation; IP, internal primer; R, reverse; bp, base pair.

**Table S3.** Clinical characteristics of the HAPE-f, HAPE-p and, HLs

|                              | HAPE-f     | HAPE-p      | HLs        | HAPE-f vs.<br>HAPE-p | HAPE-f vs. HLs | HAPE-p vs. HL |
|------------------------------|------------|-------------|------------|----------------------|----------------|---------------|
|                              |            |             |            | <i>P</i> values      |                |               |
| <b>n</b>                     | 310        | 310         | 310        |                      |                |               |
| <b>Age</b>                   | 29.5±6.2   | 29.2±8.5    | 37.5±11.2  | 0.65                 | 7.37E-22       | 1.49E-19      |
| <b>BMI, Kg/m<sup>2</sup></b> | 22.1± 3.2  | 22.9± 13.1  | 21.20± 3.5 | 0.30                 | 3.85E-04       | 0.02          |
| <b>SaO<sub>2</sub>, %</b>    | 87.7± 4.4  | 48.6± 13.5  | 87.7± 9.9  | 4.71E-77             | 8.77E-24       | 3.92E-65      |
| <b>PR, rate/min</b>          | 84.2± 20.4 | 102.8± 21.9 | 75.4± 10.6 | 6.38E-09             | 7.44E-05       | 5.76E-18      |
| <b>MAP, mmHg</b>             | 92.8± 7.8  | 95.6± 10.7  | 93.2± 6.91 | 0.02                 | 0.85           | 0.02          |

Data are presented as mean ± SD and are compared by unpaired Student's *t*-test. n, number of subjects; BMI, body mass index; SaO<sub>2</sub>, arterial oxygen saturation; %, per cent; PR, pulse rate; MAP, mean arterial pressure.

**Table S4.** System characterization for parameters after 100-ns simulation.

| Type                     | Average RMSD (Å) | Average RMSF (Å) | Radius of gyration (nm) | Average SASA (nm <sup>2</sup> ) | Average no. of Hydrogen bonds |
|--------------------------|------------------|------------------|-------------------------|---------------------------------|-------------------------------|
| <i>EDN1</i> wild-type    | 2.81             | 0.93             | 2.97                    | 130.63                          | 110                           |
| <i>EDN1</i> variant-type | 2.05             | 0.91             | 3.20                    | 129.28                          | 114                           |

Variant, K198N; Å, Angstrom; nm, nanometer; nm<sup>2</sup>, nanometre square; SASA, solvent-accessible surface area.

**Supplementary Figure S1:**

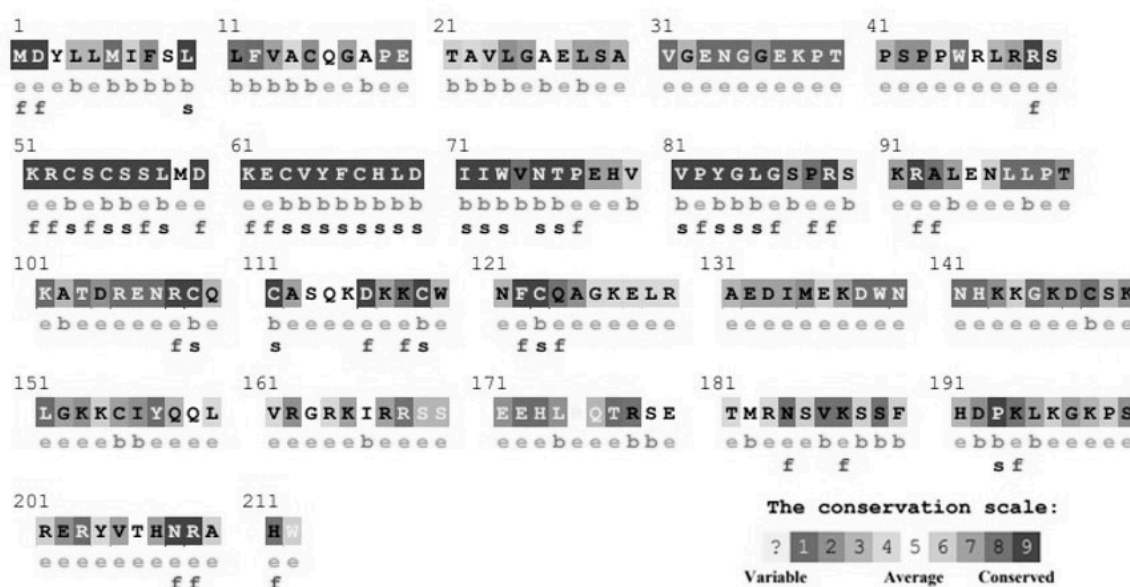

**Figure S1.** ConSurf analysis plot. The plot revealed residual conservation of the *EDN1* sequence. The rs5370 residue was located in the variable region.

## Supplementary Figure S2:

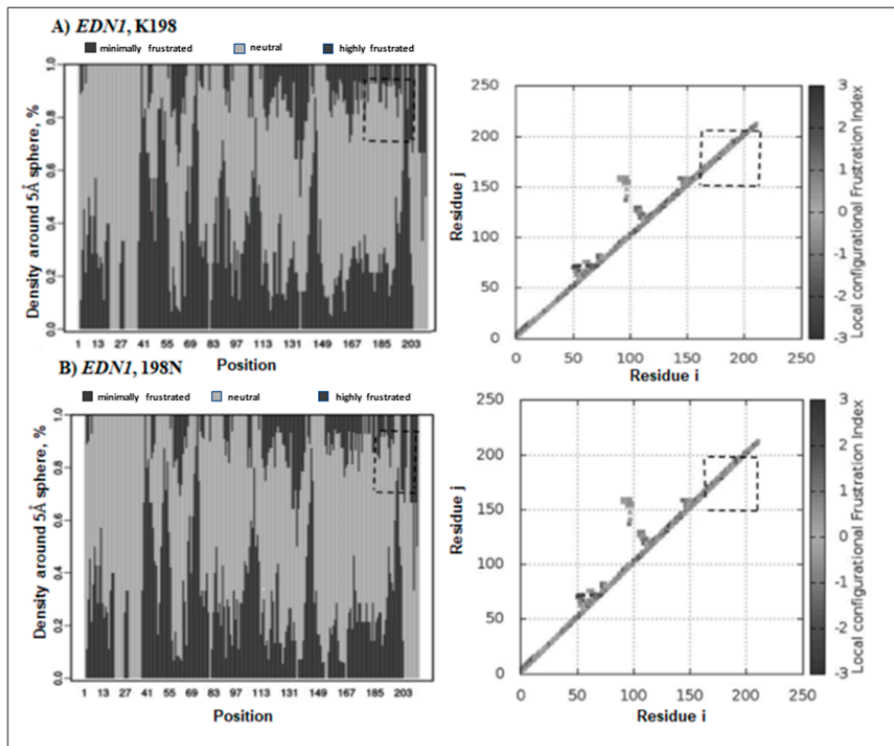

**Figure S2.** Frustration and configurational loss and gain contacts in K198N region. (A) Panel shows density and covariances matrices of *EDN1* K198. (B) Panel depicts *EDN1* 198N density and covariances matrices type. Green shades represent minimally frustrated and red shades represent highly frustrated residues. Å, Angstrom; i and j, covariance matrix for residues; %, per cent.
